# CheapStat: An Open-Source, “Do-It-Yourself” Potentiostat for Analytical and Educational Applications

Aaron A. Rowe<sup>1</sup>, Andrew J. Bonham<sup>1</sup>, Ryan J. White<sup>1</sup>, Michael P. Zimmer<sup>2</sup>, Ramsin J. Yadgar<sup>2</sup>, Tony M. Hobza<sup>2</sup>, Jim W. Honea<sup>2</sup>, Ilan Ben-Yaacov<sup>2</sup>, Kevin W. Plaxco<sup>1,2,3\*</sup>

**1** Department of Chemistry and Biochemistry, University of California Santa Barbara, Santa Barbara, California, United States of America, **2** Department of Electrical and Computer Engineering, University of California Santa Barbara, Santa Barbara, California, United States of America, **3** Program in Biomolecular Science and Engineering, University of California Santa Barbara, Santa Barbara, California, United States of America

## Abstract

Although potentiostats are the foundation of modern electrochemical research, they have seen relatively little application in resource poor settings, such as undergraduate laboratory courses and the developing world. One reason for the low penetration of potentiostats is their cost, as even the least expensive commercially available laboratory potentiostats sell for more than one thousand dollars. An inexpensive electrochemical workstation could thus prove useful in educational labs, and increase access to electrochemistry-based analytical techniques for food, drug and environmental monitoring. With these motivations in mind, we describe here the CheapStat, an inexpensive (<\$80), open-source (software and hardware), hand-held potentiostat that can be constructed by anyone who is proficient at assembling circuits. This device supports a number of potential waveforms necessary to perform cyclic, square wave, linear sweep and anodic stripping voltammetry. As we demonstrate, it is suitable for a wide range of applications ranging from food- and drug-quality testing to environmental monitoring, rapid DNA detection, and educational exercises. The device's schematics, parts lists, circuit board layout files, sample experiments, and detailed assembly instructions are available in the supporting information and are released under an open hardware license.

**Citation:** Rowe AA, Bonham AJ, White RJ, Zimmer MP, Yadgar RJ, et al. (2011) CheapStat: An Open-Source, “Do-It-Yourself” Potentiostat for Analytical and Educational Applications. PLoS ONE 6(9): e23783. doi:10.1371/journal.pone.0023783

**Editor:** Meni Wanunu, University of Pennsylvania, United States of America

**Received:** May 6, 2011; **Accepted:** July 24, 2011; **Published:** September 13, 2011

**Copyright:** © 2011 Rowe et al. This is an open-access article distributed under the terms of the Creative Commons Attribution License, which permits unrestricted use, distribution, and reproduction in any medium, provided the original author and source are credited.

**Funding:** This project was funded by a grant (OPP1015402) from the Bill and Melinda Gates Foundation through the Grand Challenges Explorations Initiative, and by the National Institutes of Health through grants GM062958-01 and 2R01EB002046. This work was performed in part under the auspices of the United States Department of Energy by Lawrence Livermore National Laboratory under Contract DE-AC52-07NA27344. The funders had no role in study design, data collection and analysis, decision to publish, or preparation of the manuscript.

**Competing Interests:** The authors have declared that no competing interests exist.

\* E-mail: kwp@chem.ucsb.edu

## Introduction

Potentiostats, the cornerstone of electrochemistry research, have seen little adoption in resource poor environments such as the developing world and teaching laboratories. An important factor in this is cost, with academic labs and industrial groups typically paying upwards of US \$10,000 for a general-purpose, research quality workstation. Indeed, even the least expensive commercially available laboratory potentiostats (*e.g.*, Dagan Chem-Clamp, DropSens  $\mu$ STAT 200) sell for more than a thousand dollars and achieve only limited functionality. An inexpensive instrument that is versatile enough to generate standard waveforms could thus significantly broaden the use of electrochemistry in resource-poor environments. Such a device would enable, for example, quantitative measurements in food and drug quality control [1], the analysis of trace metals [2], environmental monitoring [3], and the construction of simple biosensors [4][5][6][7][8].

While a do-it-yourself device cannot rival the quality and capabilities of research-grade potentiostats, many of the features of top-of-the-line commercial instruments are unnecessary for environmental or public health applications. Supporting this argument, simple potentiostats such as the home glucose meter can make reasonably precise electrochemical measurements at a cost of less than US \$100. The software and hardware designs

underlying these devices, however, are proprietary and thus are not easily modified to support other applications. Given these arguments, it is perhaps not surprising that a number of open-source potentiostats have been described in the scientific literature over the last four decades [9][10][11][12]. For example, in 1980 Bond and Norris published a description of a waveform generator that employed inexpensive integrated circuits [13], followed by Brown who, in 1982, described a more sophisticated computer-controlled instrument [14]. More recent open-source potentiostat development has focused largely on miniature potentiostats, often with implantation in mind [15][16][17][18][19][20]. These devices, however, typically do not offer a wide variety of waveforms, nor do they employ modern computer interfaces. Other recently described, open-source potentiostats employ custom-made microelectronics, rendering them ill suited for use in resource limited-applications [21][22][23]. Thus, despite significant literature precedent there remains an unmet need for an inexpensive, easily built potentiostat supporting the commonly employed electrochemical waveforms. Indeed, the desire for a low-cost, open-source, general-use potentiostat is highlighted by a recent academic attempt to “re-purpose” off-the-shelf glucose meters to support new analytical applications [24].

In response to the apparent need for a truly inexpensive, fully programmable potentiostat we present here the CheapStat

(**Figure 1**), an open-source potentiostat easily constructed by anyone proficient at assembling circuits. We believe this device may prove of value in undergraduate chemistry labs, the developing world and other environments where resources are limited. In support of this, we have demonstrated the device's utility in applications including food and drug testing, environmental monitoring, education, and biosensing.

## Materials and Methods

With the exception of the printed circuit boards, which were custom ordered from PCBex (Houston, TX ~\$30 each), all of the components required to build the CheapStat were obtained from Mouser Electronics (Mansfield, TX) at a total cost of ~\$80 per device in small numbers. The schematics for this device (Layout S1, Layout S2, Layout S3, Layout S4, Layout S5, Layout S6, Layout S7), and instructions for building it (Appendix S1), are available in the supporting information and released under an open hardware license. The necessary software (runtime and source code), and other updates, can be found on our website (<http://www.chem.ucsb.edu/~kwp/cheapstat/>).

## Measurements of Ascorbic Acid in Orange Juice

As a simple demonstration of the educational applications of the CheapStat, we have used it to measure the ascorbate concentration in orange juice. Because ascorbic acid is redox active its level in orange juice can be measured via cyclic voltammetry [1] using the method of standard additions. Doing so represents a safe, simple experiment suitable for a general chemistry or even high school lab course.

In this experiment, four orange juice samples were prepared, one of which was unmodified and the remaining three of which were modified via the addition of exogenous ascorbic acid at 0.1, 0.2 or 0.3 M. To increase their conductivity potassium chloride was added to each of these to 1 M. A graphite pencil "lead" taken from a mechanical pencil was used as the working electrode. A standard Ag/AgCl reference and platinum counter electrode were

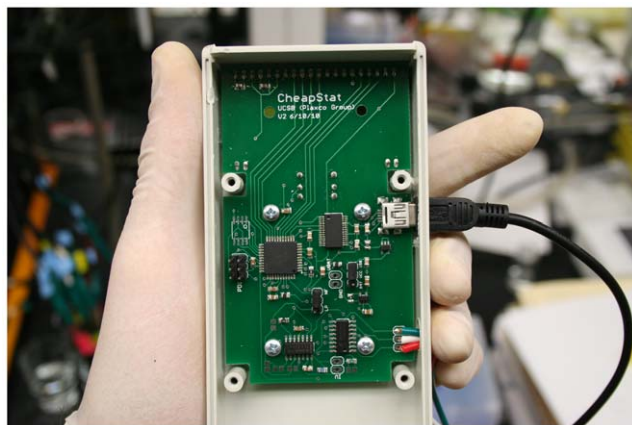

**Figure 1. The CheapStat, an inexpensive, "do-it-yourself" potentiostat that can be built for under \$80.** The device supports cyclic, square wave, linear sweep and stripping voltammetry over the potential range  $-990$  to  $+990$  mV and over frequencies from 1 to 1000 Hz. The device supports a range of environmental, food and drug quality control, and educational applications. The reverse of the circuit board supports a three-line LCD display and a joystick, which is used to select an experiment protocol, change its parameters (frequency, starting voltage, end voltage, scan rate), and initiate the experiment. doi:10.1371/journal.pone.0023783.g001

used. Measurements were made in 5 mL of the various orange juice samples (Minute Maid Original, Atlanta, Ga). Cyclic voltammetry measurements were taken from 200 to 900 mV, and the current at 550 mV was used for quantification of the orange juice. Of note, although it is the most abundant redox active species in orange juice, ascorbate is not the only redox active compound present. Specifically, other substances interfere with these measurements at potentials above 600 mV and thus ascorbate should not be determined using readings collected above 600 mV.

To determine the initial ascorbate we make a linear plot of current at 550 mV versus added ascorbate (**Figure 2**). Extrapolation of this line to 0.39 mM for the diluted sample indicates that our orange juice sample contained  $1.95 \pm 0.11$  mM of ascorbic acid, a convincing figure given the concentration (2 mM) listed on the manufacturer website.

## Monitoring Redox of Ferricyanide Using Cyclic Voltammetry

The voltammetric response and redox cycling of the reversible ferricyanide-ferrocyanide couple is a commonly used educational tool to introduce electrochemistry, and here we demonstrate this reaction using the CheapStat. In addition to its pedagogical roles, ferricyanide is a common oxidant in organic chemistry and has been used as a probe for a variety of organic and biological reactions, as the reduction of ferricyanide to ferrocyanide is easily monitored.

In this experiment, we dissolved potassium ferricyanide in 50 mL of 1 M potassium nitrate to final concentrations of 1 and 2 mM. As our working electrode we employed a simple platinum disk electrode. To further highlight the low cost and self-assembled nature of the CheapStat, these experiments were performed independently with either a standard, commercial Ag/AgCl electrode or a hand-fabricated glass pipette-based Ag/AgCl electrode (prepared as in [25]). A length of platinum wire was employed as the counter electrode, although we note that many conductive materials would serve equally well as simple counter electrodes. Using these electrodes we conducted cyclic voltammetry over the potential range from 0 to 650 mV at a rate of 10 mV/sec according to the parameters established by Bott and Jackson [26].

The ferricyanide redox response forms the characteristic "duck" shape of a fully reversible reaction in the cyclic voltammogram (**Figure 3**). Both the commercially available Ag/AgCl reference and a homemade reference demonstrate results in close agreement when observing the ferricyanide reaction at the tested concentrations.

## Analysis of Acetaminophen Content in Over-the-Counter Pain Medication Using Linear Sweep Voltammetry

As a final demonstration of the CheapStat's educational applications, we have used it to measure the acetaminophen content of a painkiller tablet. Acetaminophen is a redox active [27] anti-inflammatory medication that can be quantified by linear sweep voltammetry. Here we analyzed the acetaminophen content of an over-the-counter pain reliever using the method of standard additions.

In this experiment we dissolved a commercial pain reliever (stated to contain 500 mg acetaminophen) in 250 mL of 2 M sulfuric acid to a final theoretical concentration of 13.33 mM. Splitting this into four samples we adulterated three with increasing amounts of exogenous, pure acetaminophen at 0.002, 0.005 and 0.01 M. As our working electrode we employed a Teflon-coated gold wire of diameter 0.08 mm, a 1 cm length of

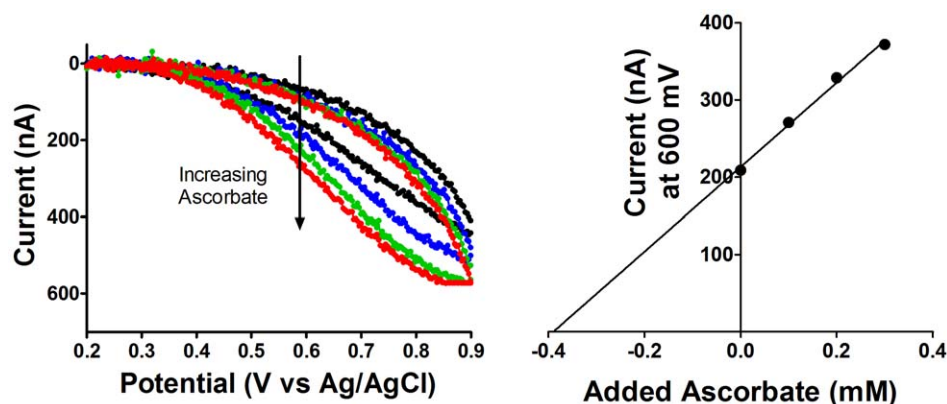

**Figure 2. The CheapStat supports cyclic voltammetry.** Shown is the CV-based measurement of ascorbic acid (Vitamin C) in orange juice, using the method of standard additions. (Left) To do so, 0, 5, 10, and 15 mL of an ascorbic acid standard solution (at 0, 0.1, 0.2, and 0.3 M in orange juice) were added to a 25 mL sample of name-brand orange juice and interrogated via cyclic voltammetry performed using an inexpensive pencil “lead” as the working electrode. (Right) A linear extrapolation of the oxidation current observed at 600 mV was used to determine the initial ascorbate concentration, which at  $1.95 \pm 0.11$  mM is quite close to the “60 mg per serving” (2 mM) indicated on the manufacturer website. doi:10.1371/journal.pone.0023783.g002

which was heated to exposed the bare gold surface. A standard Ag/AgCl electrode and a length of platinum wire were employed as the reference and counter electrode respectively. We conducted linear sweep voltammetry on these samples over the potential range from 500 to 1000 mV at a rate of 10 mV/sec.

To calculate the acetaminophen concentration in our unadulterated sample we linearly extrapolate the current observed at 850 mV (Figure 4). Extrapolation and conversion to total quantity shows that each tablet contained  $472 \pm 63$  mg of acetaminophen, which is in close agreement with the amount of acetaminophen reported on the label of the commercial product we employed.

#### Measurement of Arsenic Using Anodic Stripping Square Wave Voltammetry

In some rural parts of India and Bangladesh, arsenic in drinking water is a major health concern. We have used the CheapStat to measure arsenic [2] levels in lake water. In all areas of the world,

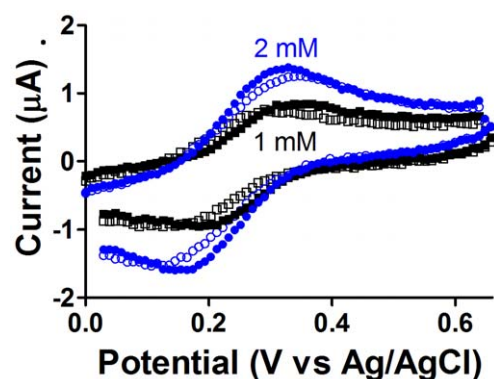

**Figure 3. The CheapStat is compatible with common educational experiments.** Shown is the cyclic voltammetry-based monitoring of potassium ferricyanide in 1 M potassium nitrate solution, using both commercial (filled symbols) and hand fabricated (open symbols) Ag/AgCl reference electrodes. Ferricyanide concentrations of 1 mM (black squares) and 2 mM (blue circles) were interrogated via cyclic voltammetry and show the characteristic voltammetric response of a fully reversible reaction. doi:10.1371/journal.pone.0023783.g003

the recommended maximum level of arsenic in drinking water is 10 ppb.

Samples of lake water were collected from Lake Cachuma (Santa Barbara, CA) and stored in Nalgene polyethylene bottles. The lake water was acidified by mixing it with concentrated hydrochloric acid in an 11 to 1 ratio. Gold disk electrodes (CH Instruments, Austin, TX) were polished in a slurry of 0.5 micron alumina on a polishing cloth and then rinsed thoroughly with deionized water. A sealed ampoule of arsenic oxide (Fluka Product #38150, via Sigma Aldrich, St Louis, Mo) was diluted 1000 fold with acidified lake water. Aliquots of the diluted standard were added to 5 mL samples of acidified lake water. The concentration of added arsenic in the samples was 5 ppb and 20 ppb.

In each lake water sample, a gold disk, platinum counter, and silver/silver chloride reference electrode were immersed. The current at the working electrode was held at  $-0.500$  mV for 120 seconds while the solution was mixed by pipetting. And then a square wave measurement at 40 Hz was run from  $-270$  mV to 600 mV. The CheapStat was easily able to make measurements at spiked 5 and 20 ppb arsenic concentrations (Figure 5). There was no detectable arsenic in the lake water samples.

#### Construction of a Simple E-DNA Biosensor and its Interrogation Using Square Wave Voltammetry

Electrochemical DNA (E-DNA) biosensors are inexpensive, reusable DNA detectors [4]. They can make quantitative measurements in complex mixtures such as blood, urine, saliva, and PCR reaction products. In this experiment, we have used an E-DNA sensor to detect a synthetic DNA oligonucleotide with a sequence found within the *salmonella* genome.

The sensing element in these devices is a synthetic 17-base oligonucleotide commercially synthesized with a thiol on its 5'-terminus and a methylene blue reporter on the opposite terminus. The thiol readily anchors the oligonucleotide to a gold electrode (via very facile self assembled monolayer chemistry), leaving the other end free to approach the electrode and transfer electrons (Figure 6). If a target molecule hybridizes with this system, the efficiency with which the methylene blue approaches—and thus transfers electrons to—the electrode surface decreases, decreasing the observed rate of electron transfer [28]. As square wave voltammetry is very sensitive to changes in electron transfer kinetics, it is ideally suited to monitor biosensors in this class [5].

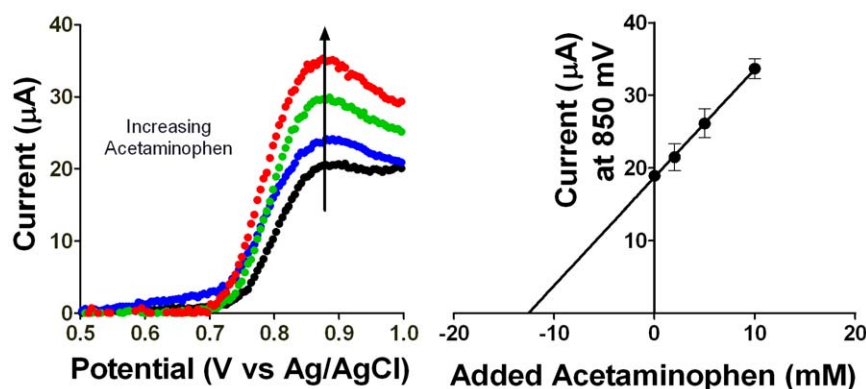

**Figure 4. Analysis of the acetaminophen content of an over-the-counter painkiller using linear sweep voltammetry.** An acetaminophen tablet was crushed and dissolved in sulfuric acid. Standards were added to three solutions, and one was left untouched. (Left) Linear sweep voltammetry performed with a gold-wire working electrode was used to measure the acetaminophen concentration by the method of standard additions. (Right) A linear extrapolation of the oxidation current observed at 850 mV was used to determine the initial acetaminophen concentration in a 250 mL solution containing one crushed tablet, which at  $12.6 \pm 1.7$  mM ( $472 \pm 63$  mg per tablet) is close to the 500 mg per tablet reported by the manufacturer.

doi:10.1371/journal.pone.0023783.g004

The DNA probe employed in this sensor was synthesized by Biosearch Technologies (Novato, CA), and the target by Sigma Genosys, a division of Sigma Aldrich (St Louis, MO). The sequences of the oligonucleotides were:

LinearSensor 5'-HS-(CH<sub>2</sub>)<sub>6</sub>-TGGATCGGCGTTT-TATT-(CH<sub>2</sub>)<sub>7</sub>-NH-MB-3' and

TargetDNA 5'-TTGAATATCTGAACAAGAA-TAAAACGCCGATCCA-3'.

To fabricate the sensor we polished gold disk electrodes using 0.05 µm alumina before cleaning them electrochemically in 0.5 M

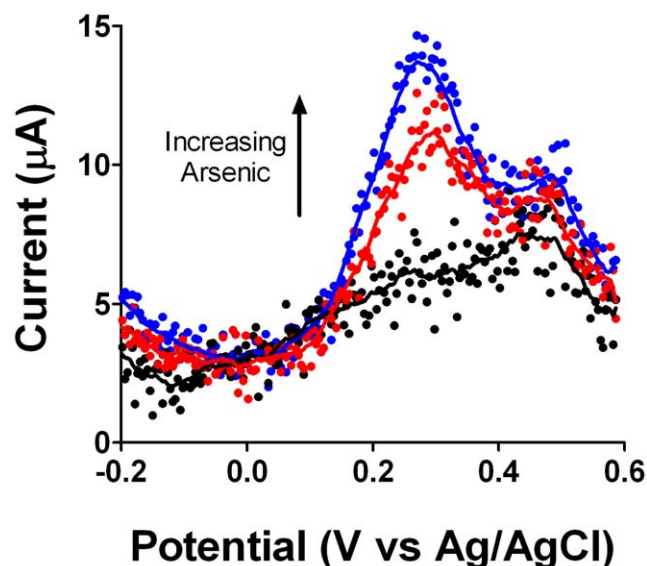

**Figure 5. Analysis of the arsenic content in three acidified lake water solutions.** Samples were collected from Lake Cachuma (Santa Barbara, CA) and mixed in an 11:1 ratio with concentrated HCl. An arsenate standard was spiked into two of the samples (top 20 ppb, middle 5 ppb), and one was left as a blank (bottom). The dissolved arsenate in each solution was reduced at  $-0.5$  V and then analyzed by square wave voltammetry at 40 Hz.

doi:10.1371/journal.pone.0023783.g005

H<sub>2</sub>SO<sub>4</sub> and 0.5 M H<sub>2</sub>SO<sub>4</sub> with 0.01 M KCl with a series of cyclic voltammetry scans. Each electrode was then rinsed in deionized water before immersion in a 200 nM solution of the relevant DNA probe in pH 7.4 phosphate buffered saline. After an hour the electrodes were rinsed with deionized water and then stored in 2 mM mercaptohexanol (to complete the formation of the self-assembled monolayer) overnight. Before use the sensors were rinsed in deionized water.

The sensors were immersed in 5 mL of phosphate buffered saline. An initial square wave voltammetry scan was made from 0 to  $-0.5$  V at 100 Hz. We then challenged the sensor by adding 100 µL of a 10 µM stock of a 34-base analyte DNA. At 30 min and 60 min after mixing we recorded new square wave scans, observing the expected 60% decrease in signal after 1 hour. These results were in good agreement with our earlier work, which used a CH Instruments 630B (Austin, Texas) potentiostat [5].

## Results and Discussion

The heart of the CheapStat is a closed-loop analog control circuit, capable of regulating electrode voltage with sub-millivolt precision as it measures electrode current with nanoamp precision. This control circuit is driven by an Atmel XMEGA microcontroller containing a Digital to Analog Converter and an Analog to Digital Converter of sufficient precision to support the relevant voltage waveform generation and current quantification. Coupled to this microcontroller a Universal Asynchronous Receiver-Transmitter to Universal Serial Bus (USB) chip provides a convenient interface between this microcontroller and a data analysis computer via a USB port. An operational amplifier feedback system sets the voltage across the electrochemical cell and supplies the current needed to drive the electrochemical reaction. We employed Texas Instruments TLC2262CP operational amplifiers (Mouser Electronics) in the CheapStat because they are low power and require little input current. Specifically, these amplifiers have an input bias current of only 1pA, which permits reliable sensing of low nanoamp currents.

Inherent in the specific device choices described above is the overarching design theme of the CheapStat: ease of fabrication, modification and use. For example, using the above-described components and an inexpensive, custom-built (and easily obtained) PC board we have hand fabricated a number of CheapStats

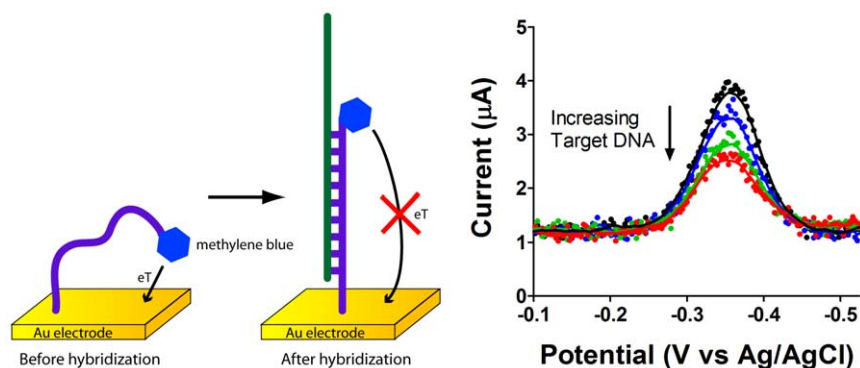

**Figure 6. The electrochemical detection of a specific DNA sequence directly in PCR mix.** An E-DNA sensor (left) was interrogated via square wave voltammetry. Scanning the E-DNA biosensor at 100 Hz before and after the addition of complimentary target (20, 60, and 200 nM in PCR mix) clearly indicates the presence of the target DNA: over the course of an hour, hybridization with the analyte (at 200 nM) caused a 61% decrease in the peak current.

doi:10.1371/journal.pone.0023783.g006

without the use of a reflow oven, wave soldering, or other sophisticated circuit assembly tools. The CheapStat firmware is likewise easily updated with the aid of a simple microcontroller programming kit. Finally, the designs of the CheapStat are available under a Creative Commons license, and the attached documentation is detailed enough to support efforts to build the CheapStat or expand upon its design.

As currently implemented the CheapStat supports square wave, linear sweep, stripping, and cyclic voltammetry over potentials from  $-990$  mV to  $990$  mV, frequencies from 1 to 1000 Hz, and currents from  $\sim 100$  nA to  $50$   $\mu$ A. These operation ranges can be expanded with simple hardware adjustments. In the event that a given experiment produces currents greater than  $50$   $\mu$ A, for example, a simple resistor can be added in series with the working electrode to bring the current back into the useful range of the device. The CheapStat is easy to use: it includes a three-line LCD display and a joystick by which the operator selects the specific protocol, defines its parameters (frequency, starting voltage, end voltage, scan rate), and initiates the experiment. Copying data from the CheapStat onto a computer is similarly easy, requiring only a single mouse click. Finally, the CheapStat is hand-held, weighs only 115 grams, is powered via its USB port, and it can be controlled by a simple laptop or netbook computer, rendering the device portable and field ready.

To demonstrate the utility of the CheapStat we have conducted a set of simple experiments spanning a range of representative applications. These include the use of cyclic voltammetry and an inexpensive, pencil “lead” working electrode to measure vitamin C (ascorbic acid) in orange juice (Figure 2), cyclic voltammetry to observe the reversible ferricyanide/ferrocyanide reaction (Figure 3), and linear sweep voltammetry to determine the acetaminophen (paracetamol) content of an over-the-counter painkiller (Figure 4) –experiments typical of those found in undergraduate laboratory courses. To illustrate the ability of the CheapStat to support more complex analytical applications, we have also demonstrated the use of anodic stripping square wave voltammetry to analyze the arsenic content in several spiked lake water solutions (Figure 5) and square wave voltammetry to measure the concentration of a specific DNA sequence directly in PCR mix using a simple electrochemical DNA (E-DNA) biosensor (Figure 6).

The CheapStat may prove of particular value as an educational tool. In each of the above experiments, for example, we obtained results of sufficient quality and reproducibility for facile interpre-

tation by people who have little experience with chemical benchwork. Moreover, from an educational standpoint, the difficulty of using the CheapStat is quite low, rendering it quite suitable for college freshmen, or even high school students. With the increasingly significant role that electrochemistry plays in alternative energy and analytical technologies, the importance of accessible access to electrochemistry continues to grow. Electrochemistry likewise provides a powerful vehicle for teaching students about a broad range of topics within chemistry, including thermodynamics, redox reactions, reaction kinetics and titrations. Given these observations, we believe the availability of an inexpensive potentiostat such as that described here could have a positive impact on chemical education.

Beyond educational use, the CheapStat may also prove useful for analytical applications in the developing world. As we have shown, for example, the CheapStat supports the determination of arsenic in lake water<sup>2</sup>, an all too common environmental contaminant across broad areas of South Asia, where groundwater contamination is a pressing problem [29][30][31]. Indeed, while the development of low-cost approaches to remove arsenic from drinking water are well established, quantitative assays to determine the effectiveness of such treatment are cumbersome, requiring bulky instruments that cannot be brought into the field [32]. The CheapStat can analyze arsenic in minutes at concentrations well below the 10 ppb limit set by the US Environmental Protection Agency and World Health Organization.

## Conclusions

The CheapStat represents one example of a growing trend towards low-cost, easily fabricated analytical devices. Recent years have seen, for example, the development of inexpensive microfluidic devices made from polystyrene sheets [32][33][34][35], paper [24][36][37][38][39][40] and even gelatin [41]. Agrawal and Ugaz [42][43][44] have even developed an extremely inexpensive and portable PCR machine, which replaces an expensive Peltier chip with a ring shaped reaction vessel and three heating zones set at fixed temperatures. Finally, inexpensive surface enhanced Raman spectroscopy substrates [45][46] centrifugation equipment [47], and spectrometers [48][49] have all been reported in the recent literature. Moving forward, it is easy to imagine that technologies such as these could be integrated with the CheapStat to increase their utility in advanced analytical applications, including medical diagnostics.

## Supporting Information

### Appendix S1 Instructions for building a CheapStat, parts list, circuit diagrams and user notes.

(DOCX)

### Layout S1 Schematics that can be used to view or order the necessary printed circuit board.

(GBL)

### Layout S2 Schematics that can be used to view or order the necessary printed circuit board.

(GBS)

### Layout S3 Schematics that can be used to view or order the necessary printed circuit board.

(GTL)

### Layout S4 Schematics that can be used to view or order the necessary printed circuit board.

(GTO)

### Layout S5 Schematics that can be used to view or order the necessary printed circuit board.

(GTS)

## References

- King D, Friend J, Kariuki J (2010) Measuring Vitamin C Content of Commercial Orange Juice Using a Pencil Lead Electrode. *Journal of Chemical Education* 87: 507–509. doi:10.1021/ed800151x.
- Forsberg G, O'Laughlin JW, Megargle RG, Koirtiyhann SR (1975) Determination of arsenic by anodic stripping voltammetry and differential pulse anodic stripping voltammetry. *Analytical Chemistry* 47: 1586–1592. doi:10.1021/ac60359a057.
- Lee SW, Meranger JC (1981) Determination of total arsenic species by anodic stripping voltammetry. *Analytical Chemistry* 53: 130–131. doi:10.1021/ac00224a036.
- Xiao Y, Lai RY, Plaxco KW (2007) Preparation of electrode-immobilized, redox-modified oligonucleotides for electrochemical DNA and aptamer-based sensing. *Nat Protocols* 2: 2875–2880. doi:10.1038/nprot.2007.413.
- Lubin AA, Vander Stoep Hunt B, White RJ, Plaxco KW (2009) Effects of Probe Length, Probe Geometry, and Redox-Tag Placement on the Performance of the Electrochemical E-DNA Sensor. *Analytical Chemistry* 81: 2150–2158. doi:10.1021/ac802317k.
- Fan C (2003) Electrochemical interrogation of conformational changes as a reagentless method for the sequence-specific detection of DNA. *Proceedings of the National Academy of Sciences* 100: 9134–9137. doi:10.1073/pnas.1633515100.
- Ricci F, Lai RY, Plaxco KW (2007) Linear, redox modified DNA probes as electrochemical DNA sensors. *Chem Commun*: 3768. doi:10.1039/b708882e.
- Ricci F, Plaxco KW (2008) E-DNA sensors for convenient, label-free electrochemical detection of hybridization. *Microchim Acta* 163: 149–155. doi:10.1007/s00604-008-0015-4.
- Stock JT (1968) A simple low-current potentiostat coulometric analysis. *Journal of Chemical Education* 45: 736. doi:10.1021/ed045p736.
- Goldsworthy WW, Clem RG (1971) Digital potentiostat. *Analytical Chemistry* 43: 1718–1720. doi:10.1021/ac60306a025.
- van Sway M (1978) XCVI. Practical potentiostat-coulometer for the student laboratory and for routine research use. *Journal of Chemical Education* 55: A7. doi:10.1021/ed055pA7.
- Vassos BH, Martinez G (1978) Computer interfaceable potentiostat. *Analytical Chemistry* 50: 665–668. doi:10.1021/ac50026a036.
- Bond AM, Norris A (1980) Inexpensive microprocessor controlled programmable function generators for use in electrochemistry. *Analytical Chemistry* 52: 367–371. doi:10.1021/ac50052a043.
- Brown OR (1982) Control of electrochemical experiments by an inexpensive personal microcomputer. *Electrochimica Acta* 27: 33–46. doi:10.1016/0013-4686(82)80057-1.
- Vittal A, Russell D (2005) An Inexpensive Field-Portable Programmable Potentiostat. *The Chemical Educator* 11: 23–28.
- Kakerow R, Kappert H, Spiegel E, Manoli Y (1995) Low-power single-chip CMOS potentiostat. *In*.
- Cumyn VK, Fleischauer MD, Hatchard TD, Dahn JR (2003) Design and Testing of a Low-Cost Multichannel Pseudopotentiostat for Quantitative Combinatorial Electrochemical Measurements on Large Electrode Arrays. *Electrochem Solid-State Lett* 6: E15–E18. doi:10.1149/1.1570031.
- Steinberg MD, Lowe CR (2004) A micropower amperometric potentiostat. *Sensors and Actuators B: Chemical* 97: 284–289. doi:10.1016/j.snb.2003.09.002.
- Huaqing Li, Xianbo Luo, Chunxiu Liu, Liying Jiang, Dafu Cui, et al. (2004) Multi-channel electrochemical detection system based on labVIEW. In International Conference on Information Acquisition, 2004, Proceedings. Hefei, China. pp 224–227. Available: [http://ieeexplore.ieee.org/xpls/abs\\_all.jsp?arnumber=1373356&tag=1](http://ieeexplore.ieee.org/xpls/abs_all.jsp?arnumber=1373356&tag=1). Accessed 2010 Nov 8.
- Huang C-Y, Lee M-H, Wu Z-H, Tseng H-Y, Huang Y-C, et al. (2009) A Portable Potentiostat with Molecularly Imprinted Polymeric Electrode for Dopamine Sensing. In Testing and Diagnosis, 2009, ICTD 2009. IEEE Circuits and Systems International Conference on. pp 1–4. doi:10.1109/CAS-ICTD.2009.4960767.
- Kimura M, Fukushima H, Sagawa Y, Setsu K, Hara H, et al. (2009) An Integrated Potentiostat With an Electrochemical Cell Using Thin-Film Transistors. *Electron Devices, IEEE Transactions on* 56: 2114–2119. doi:10.1109/TED.2009.2026120.
- SungkilHwang, Sonkusale S (2010) CMOS VLSI Potentiostat for Portable Environmental Sensing Applications. *Sensors Journal, IEEE* 10: 820–821. doi:10.1109/JSEN.2009.2035098.
- Ayers S, Gillis KD, Lindau M, Minch BA (2007) Design of a CMOS Potentiostat Circuit for Electrochemical Detector Arrays. *Circuits and Systems I: Regular Papers, IEEE Transactions on* 54: 736–744. doi:10.1109/TCSI.2006.888777.
- Nie Z, Nijhuis CA, Gong J, Chen X, Kumachev A, et al. (2010) Electrochemical sensing in paper-based microfluidic devices. *Lab Chip* 10: 477. doi:10.1039/b917150a.
- East GA, del Valle MA (2000) Easy-to-Make Ag/AgCl Reference Electrode. *Journal of Chemical Education* 77: 97. doi:10.1021/ed077p97.
- Bott AW, Jackson BP (1996) Study of Ferricyanide by Cyclic Voltammetry Using the CV-50W. *Current Separations* 15: 25–30.
- Van Benschoten JJ, Lewis JY, Heineman WR, Roston DA, Kissinger PT (1983) Cyclic voltammetry experiment. *Journal of Chemical Education* 60: 772. doi:10.1021/ed060p772.
- Uzawa T, Cheng RR, White RJ, Makarov DE, Plaxco KW (2010) A Mechanistic Study of Electron Transfer from the Distal Termini of Electrode-Bound, Single-Stranded DNAs. *Journal of the American Chemical Society* 132: 16120–16126. doi:10.1021/ja106345d.
- Lubin JH, Beane Freeman LE, Cantor KP (2007) Inorganic Arsenic in Drinking Water: An Evolving Public Health Concern. *Journal of the National Cancer Institute* 99: 906–907. doi:10.1093/jnci/djm012.
- Chen Y, Ahsan H (2004) Cancer burden from arsenic in drinking water in Bangladesh. *Am J Public Health* 94: 741–744.
- Ohno K, Yanase T, Matsuo Y, Kimura T, Hamidur Rahman M, et al. (2007) Arsenic intake via water and food by a population living in an arsenic-affected area of Bangladesh. *Science of The Total Environment* 381: 63–76. doi:10.1016/j.scitotenv.2007.03.019.
- Behari JR, Prakash R (2006) Determination of total arsenic content in water by atomic absorption spectroscopy (AAS) using vapour generation assembly (VGA). *Chemosphere* 63: 17–21. doi:10.1016/j.chemosphere.2005.07.073.
- Grimes A, Breslauer DN, Long M, Pegan J, Lee LP, et al. (2008) Shrinky-Dink microfluidics: rapid generation of deep and rounded patterns. *Lab Chip* 8: 170. doi:10.1039/b711622e.
- Nguyen D, Taylor D, Qian K, Norouzi N, Rasmussen J, et al. (2010) Better shrinkage than Shrinky-Dinks. *Lab Chip* 10: 1623–1626. doi:10.1039/c001082k.

### Layout S6 Schematics that can be used to view or order the necessary printed circuit board.

(OLN)

### Layout S7 Schematics that can be used to view or order the necessary printed circuit board.

(TXT)

## Acknowledgments

The authors would like to thank Joseph Jackson, Kelly Chuh, Erin Miller, and Bob Makenen for their support and encouragement during this project.

## Author Contributions

Conceived and designed the experiments: AAR AJB. Performed the experiments: AAR AJB. Analyzed the data: AAR AJB. Contributed reagents/materials/analysis tools: MPZ. Wrote the paper: AAR AJB KWP. Contributed to the design of the instrument: RJW RJY TMH JMH IB-Y. Conducted troubleshooting with the prototype: RJW RJY TMH JMH IB-Y.

35. Chen C-S, Breslauer DN, Luna JI, Grimes A, Chin W-C, et al. (2008) Shrinky-Dink microfluidics: 3D polystyrene chips. *Lab Chip* 8: 622–624. doi:10.1039/b719029h.
36. Nie Z, Deiss F, Liu X, Akbulut O, Whitesides GM (2010) Integration of paper-based microfluidic devices with commercial electrochemical readers. *Lab Chip* 10: 3163. doi:10.1039/c0lc00237b.
37. Dungchai W, Chailapakul O, Henry CS (2009) Electrochemical Detection for Paper-Based Microfluidics. *Analytical Chemistry* 81: 5821–5826. doi:10.1021/ac9007573.
38. Carrilho E, Martinez AW, Whitesides GM (2009) Understanding Wax Printing: A Simple Micropatterning Process for Paper-Based Microfluidics. *Analytical Chemistry* 81: 7091–7095. doi:10.1021/ac901071p.
39. Siegel AC, Phillips ST, Wiley BJ, Whitesides GM (2009) Thin, lightweight, foldable thermochromic displays on paper. *Lab Chip* 9: 2775. doi:10.1039/b905832j.
40. Ellerbee AK, Phillips ST, Siegel AC, Mirica KA, Martinez AW, et al. (2009) Quantifying Colorimetric Assays in Paper-Based Microfluidic Devices by Measuring the Transmission of Light through Paper. *Analytical Chemistry* 81: 8447–8452. doi:10.1021/ac901307q.
41. Yang CWT, Ouellet E, Lagally ET (2010) Using Inexpensive Jell-O Chips for Hands-On Microfluidics Education. *Analytical Chemistry* 82: 5408–5414. doi:10.1021/ac902926x.
42. Agrawal N, Hassan YA, Ugaz VM (2007) A Pocket-Sized Convective PCR Thermocycler. *Angew Chem* 119: 4394–4397. doi:10.1002/ange.200700306.
43. Agrawal N, Ugaz V (2007) A Buoyancy-Driven Compact Thermocycler for Rapid PCR. *Clinics in Laboratory Medicine* 27: 215–223. doi:10.1016/j.cll.2007.01.004.
44. Muddu R, Hassan YA, Ugaz VM (2011) Rapid PCR Thermocycling using Microscale Thermal Convection. *JoVE*, Available: <http://www.jove.com/Details.stp?ID=2366>. Accessed 2011 Mar 29.
45. Gutés A, Carraro C, Maboudian R (2010) Silver Dendrites from Galvanic Displacement on Commercial Aluminum Foil As an Effective SERS Substrate. *Journal of the American Chemical Society* 132: 1476–1477. doi:10.1021/ja909806t.
46. Yu WW, White IM (2010) Inkjet Printed Surface Enhanced Raman Spectroscopy Array on Cellulose Paper. *Analytical Chemistry* 82: 9626–9630. doi:10.1021/ac102475k.
47. Wong AP, Gupta M, Shevkopyas SS, Whitesides GM (2008) Egg beater as centrifuge: isolating human blood plasma from whole blood in resource-poor settings. *Lab Chip* 8: 2032. doi:10.1039/b809830c.
48. Mohr C, Spencer CL, Hippler M (2010) Inexpensive Raman Spectrometer for Undergraduate and Graduate Experiments and Research. *Journal of Chemical Education* 87: 326–330. doi:10.1021/ed800081t.
49. Safford HW, Westneat DF (1953) An inexpensive, easily constructed spectrophotometer. *Journal of Chemical Education* 30: 343. doi:10.1021/ed030p343.
