# Supplementary material for: CheapStat: An Open-Source, “Do-It-Yourself” Potentiostat for Analytical and Educational Applications
Source: PLoS One. 2011 Sep 13;6(9):e23783. doi: 10.1371/journal.pone.0023783 (PMC3172209; doi:10.1371/journal.pone.0023783)
Supplement: Layout S2 — Schematics that can be used to view or order the necessary printed circuit board. (GBS) [file pone.0023783.s003.gbs]

G75*
G70*
%OFA0B0*%
%FSLAX24Y24*%
%IPPOS*%
%LPD*%
%AMOC8*
5,1,8,0,0,1.08239X$1,22.5*
%
%ADD10C,0.1340*%
%ADD11OC8,0.0680*%
%ADD12C,0.0595*%
%ADD13C,0.0674*%
%ADD14C,0.0789*%
%ADD15C,0.0680*%
%ADD16C,0.0640*%
%ADD17C,0.0390*%
%ADD18C,0.0440*%
D10*
X004351Y005866D03*
X020296Y005866D03*
X032500Y005866D03*
X032500Y016890D03*
X020296Y016890D03*
X004351Y016890D03*
D11*
X013101Y020351D03*
X014101Y020351D03*
X015101Y020351D03*
X015101Y021351D03*
X014101Y021351D03*
X013101Y021351D03*
D12*
X025844Y020852D02*
X026359Y020852D01*
X026359Y019852D02*
X025844Y019852D01*
X036844Y019852D02*
X037359Y019852D01*
X037359Y018852D02*
X036844Y018852D01*
X036844Y017852D02*
X037359Y017852D01*
X037359Y016852D02*
X036844Y016852D01*
X036844Y015852D02*
X037359Y015852D01*
X037359Y014852D02*
X036844Y014852D01*
X036844Y013852D02*
X037359Y013852D01*
X037359Y012852D02*
X036844Y012852D01*
X036844Y011852D02*
X037359Y011852D01*
X037359Y010852D02*
X036844Y010852D01*
X036844Y009852D02*
X037359Y009852D01*
X037359Y008852D02*
X036844Y008852D01*
X036844Y007852D02*
X037359Y007852D01*
X037359Y006852D02*
X036844Y006852D01*
X036844Y005852D02*
X037359Y005852D01*
X037359Y004852D02*
X036844Y004852D01*
X036844Y003852D02*
X037359Y003852D01*
X037359Y002852D02*
X036844Y002852D01*
X036844Y001852D02*
X037359Y001852D01*
X026359Y001852D02*
X025844Y001852D01*
X025844Y002852D02*
X026359Y002852D01*
X036844Y020852D02*
X037359Y020852D01*
D13*
X023376Y013378D03*
X023376Y009323D03*
D14*
X022274Y009323D03*
X024833Y009323D03*
X024833Y013378D03*
X022274Y013378D03*
D15*
X004101Y002151D02*
X004101Y001551D01*
X005101Y001551D02*
X005101Y002151D01*
X006101Y002151D02*
X006101Y001551D01*
X002601Y009051D02*
X002601Y009651D01*
X001601Y009651D02*
X001601Y009051D01*
X011827Y009098D02*
X011827Y009698D01*
X012827Y009698D02*
X012827Y009098D01*
D16*
X012851Y007631D02*
X012851Y007071D01*
X011851Y007071D02*
X011851Y007631D01*
X013851Y007631D02*
X013851Y007071D01*
X010851Y011321D02*
X010851Y011881D01*
X009851Y011881D02*
X009851Y011321D01*
X008851Y011321D02*
X008851Y011881D01*
D17*
X007413Y014351D03*
X012101Y016851D03*
X015601Y014851D03*
X017601Y013351D03*
X021376Y014851D03*
X018601Y016101D03*
X016101Y020851D03*
X020751Y021351D03*
X002601Y013851D03*
X005601Y006601D03*
X008851Y006601D03*
X013226Y005601D03*
X016101Y003351D03*
X019601Y004851D03*
X015601Y008851D03*
D18*
X016151Y007376D03*
X016751Y007376D03*
X018926Y004676D03*
X019201Y002401D03*
X008226Y008476D03*
X006726Y008476D03*
X007851Y007351D03*
X005601Y005851D03*
X004851Y009101D03*
X004851Y010726D03*
X005601Y010726D03*
X006601Y010601D03*
X007351Y010851D03*
X008101Y010101D03*
X004851Y011601D03*
X003601Y011601D03*
X006476Y012851D03*
X004351Y013351D03*
X004351Y014351D03*
X005101Y016101D03*
X009101Y014351D03*
X011226Y012976D03*
X011226Y012476D03*
X009801Y012801D03*
X013101Y012913D03*
X013701Y012888D03*
X014351Y012851D03*
X014101Y014351D03*
X011601Y015101D03*
X011601Y015601D03*
X013601Y017101D03*
X014601Y017101D03*
X015351Y017101D03*
X012601Y017851D03*
X011851Y017851D03*
X012601Y018851D03*
X018001Y019151D03*
X018001Y021101D03*
X023651Y015301D03*
X021863Y014351D03*
X019201Y013401D03*
X018251Y013401D03*
X029351Y018601D03*
X035751Y006851D03*
X032651Y003751D03*
X000601Y011601D03*
M02*
