# Supplementary material for: CheapStat: An Open-Source, “Do-It-Yourself” Potentiostat for Analytical and Educational Applications
Source: PLoS One. 2011 Sep 13;6(9):e23783. doi: 10.1371/journal.pone.0023783 (PMC3172209; doi:10.1371/journal.pone.0023783)
Supplement: Layout S3 — Schematics that can be used to view or order the necessary printed circuit board. (GTL) [file pone.0023783.s004.gtl]

G75*
G70*
%OFA0B0*%
%FSLAX24Y24*%
%IPPOS*%
%LPD*%
%AMOC8*
5,1,8,0,0,1.08239X$1,22.5*
%
%ADD10C,0.0010*%
%ADD11R,0.0217X0.0610*%
%ADD12R,0.0610X0.0217*%
%ADD13R,0.0512X0.0591*%
%ADD14R,0.0591X0.0512*%
%ADD15R,0.0701X0.0402*%
%ADD16OC8,0.0600*%
%ADD17R,0.0866X0.0236*%
%ADD18R,0.0260X0.0800*%
%ADD19R,0.0157X0.0591*%
%ADD20C,0.0515*%
%ADD21C,0.0594*%
%ADD22C,0.0709*%
%ADD23R,0.0787X0.0984*%
%ADD24R,0.0787X0.1299*%
%ADD25R,0.0197X0.1220*%
%ADD26R,0.0472X0.0217*%
%ADD27C,0.0600*%
%ADD28R,0.0402X0.0701*%
%ADD29C,0.0560*%
%ADD30R,0.0866X0.0197*%
%ADD31C,0.0100*%
%ADD32C,0.0070*%
%ADD33C,0.0310*%
%ADD34C,0.0360*%
D10*
X002511Y000111D02*
X002511Y002911D01*
X000111Y002911D01*
X000111Y019811D01*
X002511Y019811D01*
X002511Y022611D01*
X022511Y022611D01*
X022511Y019811D01*
X025311Y019811D01*
X025311Y022611D01*
X038111Y022611D01*
X038111Y000111D01*
X025311Y000111D01*
X025311Y002911D01*
X022511Y002911D01*
X022511Y000111D01*
X002511Y000111D01*
D11*
X013536Y013597D03*
X013851Y013597D03*
X014166Y013597D03*
X014481Y013597D03*
X014796Y013597D03*
X015111Y013597D03*
X015426Y013597D03*
X015741Y013597D03*
X016056Y013597D03*
X016371Y013597D03*
X016686Y013597D03*
X016686Y018125D03*
X016371Y018125D03*
X016056Y018125D03*
X015741Y018125D03*
X015426Y018125D03*
X015111Y018125D03*
X014796Y018125D03*
X014481Y018125D03*
X014166Y018125D03*
X013851Y018125D03*
X013536Y018125D03*
D12*
X012847Y017436D03*
X012847Y017121D03*
X012847Y016806D03*
X012847Y016491D03*
X012847Y016176D03*
X012847Y015861D03*
X012847Y015546D03*
X012847Y015231D03*
X012847Y014916D03*
X012847Y014601D03*
X012847Y014286D03*
X017375Y014286D03*
X017375Y014601D03*
X017375Y014916D03*
X017375Y015231D03*
X017375Y015546D03*
X017375Y015861D03*
X017375Y016176D03*
X017375Y016491D03*
X017375Y016806D03*
X017375Y017121D03*
X017375Y017436D03*
D13*
X014985Y019111D03*
X014237Y019111D03*
X007485Y016861D03*
X006737Y016861D03*
X002543Y017683D03*
X001795Y017683D03*
X012987Y012236D03*
X013735Y012236D03*
X015237Y012361D03*
X015985Y012361D03*
X017237Y012361D03*
X017985Y012361D03*
X013735Y010861D03*
X012987Y010861D03*
X016087Y006711D03*
X016835Y006711D03*
X017987Y006711D03*
X018735Y006711D03*
X018735Y005461D03*
X017987Y005461D03*
X014735Y005611D03*
X013987Y005611D03*
X012485Y005611D03*
X011737Y005611D03*
D14*
X008486Y005237D03*
X008486Y005985D03*
X002611Y007237D03*
X001561Y007237D03*
X001561Y007985D03*
X002611Y007985D03*
X001611Y010737D03*
X001611Y011485D03*
X001861Y012487D03*
X001861Y013235D03*
X001861Y014237D03*
X001861Y014985D03*
X001861Y015987D03*
X001861Y016735D03*
X006611Y014235D03*
X006611Y013487D03*
X007611Y015237D03*
X007611Y015985D03*
X010361Y016487D03*
X011361Y016487D03*
X011361Y017235D03*
X010361Y017235D03*
X020641Y015475D03*
X020641Y014727D03*
X035611Y016987D03*
X035611Y017735D03*
X035611Y019987D03*
X035611Y020735D03*
D15*
X014111Y009461D03*
X014111Y008760D03*
X010611Y015010D03*
X010611Y015711D03*
D16*
X013111Y020361D03*
X014111Y020361D03*
X015111Y020361D03*
X015111Y021361D03*
X014111Y021361D03*
X013111Y021361D03*
D17*
X005384Y015361D03*
X005384Y014861D03*
X005384Y014361D03*
X005384Y013861D03*
X005384Y013361D03*
X005384Y012861D03*
X005384Y012361D03*
X003337Y012361D03*
X003337Y012861D03*
X003337Y013361D03*
X003337Y013861D03*
X003337Y014361D03*
X003337Y014861D03*
X003337Y015361D03*
D18*
X003861Y009821D03*
X004361Y009821D03*
X004861Y009821D03*
X005361Y009821D03*
X005861Y009821D03*
X006361Y009821D03*
X006861Y009821D03*
X007361Y009821D03*
X007361Y007401D03*
X006861Y007401D03*
X006361Y007401D03*
X005861Y007401D03*
X005361Y007401D03*
X004861Y007401D03*
X004361Y007401D03*
X003861Y007401D03*
D19*
X016497Y008084D03*
X016753Y008084D03*
X017009Y008084D03*
X017265Y008084D03*
X017521Y008084D03*
X017777Y008084D03*
X018033Y008084D03*
X018289Y008084D03*
X018545Y008084D03*
X018801Y008084D03*
X019057Y008084D03*
X019312Y008084D03*
X019568Y008084D03*
X019824Y008084D03*
X019824Y010938D03*
X019568Y010938D03*
X019312Y010938D03*
X019057Y010938D03*
X018801Y010938D03*
X018545Y010938D03*
X018289Y010938D03*
X018033Y010938D03*
X017777Y010938D03*
X017521Y010938D03*
X017265Y010938D03*
X017009Y010938D03*
X016753Y010938D03*
X016497Y010938D03*
D20*
X025854Y002862D02*
X026369Y002862D01*
X026369Y001862D02*
X025854Y001862D01*
X036854Y001862D02*
X037369Y001862D01*
X037369Y002862D02*
X036854Y002862D01*
X036854Y003862D02*
X037369Y003862D01*
X037369Y004862D02*
X036854Y004862D01*
X036854Y005862D02*
X037369Y005862D01*
X037369Y006862D02*
X036854Y006862D01*
X036854Y007862D02*
X037369Y007862D01*
X037369Y008862D02*
X036854Y008862D01*
X036854Y009862D02*
X037369Y009862D01*
X037369Y010862D02*
X036854Y010862D01*
X036854Y011862D02*
X037369Y011862D01*
X037369Y012862D02*
X036854Y012862D01*
X036854Y013862D02*
X037369Y013862D01*
X037369Y014862D02*
X036854Y014862D01*
X036854Y015862D02*
X037369Y015862D01*
X037369Y016862D02*
X036854Y016862D01*
X036854Y017862D02*
X037369Y017862D01*
X037369Y018862D02*
X036854Y018862D01*
X036854Y019862D02*
X037369Y019862D01*
X037369Y020862D02*
X036854Y020862D01*
X026369Y020862D02*
X025854Y020862D01*
X025854Y019862D02*
X026369Y019862D01*
D21*
X023386Y013388D03*
X023386Y009333D03*
D22*
X022284Y009333D03*
X024843Y009333D03*
X024843Y013388D03*
X022284Y013388D03*
D23*
X021620Y001844D03*
X018076Y001844D03*
D24*
X018076Y003537D03*
X021620Y003537D03*
D25*
X020478Y003576D03*
X020163Y003576D03*
X019848Y003576D03*
X019533Y003576D03*
X019218Y003576D03*
D26*
X016623Y003735D03*
X016623Y003361D03*
X016623Y002987D03*
X015599Y002987D03*
X015599Y003735D03*
X010623Y005737D03*
X009599Y005737D03*
X009599Y006111D03*
X009599Y006485D03*
X010623Y006485D03*
D27*
X011837Y009108D02*
X011837Y009708D01*
X012837Y009708D02*
X012837Y009108D01*
X002611Y009061D02*
X002611Y009661D01*
X001611Y009661D02*
X001611Y009061D01*
X004111Y002161D02*
X004111Y001561D01*
X005111Y001561D02*
X005111Y002161D01*
X006111Y002161D02*
X006111Y001561D01*
D28*
X009760Y007611D03*
X010461Y007611D03*
X016110Y005461D03*
X016811Y005461D03*
D29*
X013861Y007081D02*
X013861Y007641D01*
X012861Y007641D02*
X012861Y007081D01*
X011861Y007081D02*
X011861Y007641D01*
X010861Y011331D02*
X010861Y011891D01*
X009861Y011891D02*
X009861Y011331D01*
X008861Y011331D02*
X008861Y011891D01*
D30*
X017169Y019861D03*
X017169Y020361D03*
X017169Y020861D03*
X017169Y021361D03*
X019653Y021357D03*
X019653Y020857D03*
X019653Y020357D03*
X019653Y019861D03*
D31*
X018653Y018861D01*
X016711Y018861D01*
X016371Y018521D01*
X016371Y018125D01*
X016686Y018125D02*
X018525Y018125D01*
X019661Y019261D01*
X025211Y019261D01*
X030611Y013861D01*
X037111Y013861D01*
X037112Y013862D01*
X037112Y012862D02*
X037111Y012861D01*
X030761Y012861D01*
X024811Y018811D01*
X019711Y018811D01*
X018336Y017436D01*
X017375Y017436D01*
X017375Y017121D02*
X018521Y017121D01*
X019761Y018361D01*
X024461Y018361D01*
X030961Y011861D01*
X037111Y011861D01*
X037112Y011862D01*
X037112Y010862D02*
X037111Y010861D01*
X031161Y010861D01*
X024111Y017911D01*
X019811Y017911D01*
X018706Y016806D01*
X017375Y016806D01*
X017375Y016491D02*
X017370Y016486D01*
X016861Y016486D01*
X016056Y015681D01*
X016056Y013597D01*
X016056Y012432D01*
X015985Y012361D01*
X017237Y012361D01*
X017861Y012237D02*
X017985Y012361D01*
X018289Y012057D01*
X018289Y010938D01*
X018801Y010938D02*
X018801Y013921D01*
X018111Y014611D01*
X017384Y014611D01*
X017375Y014601D01*
X017375Y014286D02*
X017436Y014286D01*
X018261Y013411D01*
X017611Y013361D02*
X017611Y012861D01*
X018111Y012361D01*
X017861Y012237D02*
X017861Y012111D01*
X019211Y012011D02*
X019811Y011411D01*
X019811Y010951D01*
X019824Y010938D01*
X019057Y010938D02*
X019057Y010490D01*
X019261Y010186D01*
X026236Y010186D01*
X032661Y003761D01*
X034561Y001861D01*
X037111Y001861D01*
X037111Y001862D01*
X037111Y002862D02*
X036860Y002862D01*
X028061Y011661D01*
X021561Y011661D01*
X017991Y015231D01*
X017375Y015231D01*
X017375Y015546D02*
X018176Y015546D01*
X021561Y012161D01*
X028211Y012161D01*
X035611Y004861D01*
X037111Y004861D01*
X037112Y004862D01*
X037112Y005862D02*
X035362Y005862D01*
X035361Y005861D01*
X028461Y012661D01*
X021561Y012661D01*
X018361Y015861D01*
X017375Y015861D01*
X017375Y016176D02*
X018546Y016176D01*
X018611Y016111D01*
X019961Y014761D01*
X020307Y014761D01*
X020641Y014727D01*
X020575Y014761D01*
X021261Y014761D01*
X021361Y014861D01*
X021873Y014361D02*
X022414Y014361D01*
X023386Y013388D01*
X023661Y015311D02*
X023661Y015361D01*
X020461Y015361D01*
X020641Y015475D01*
X020405Y015311D01*
X019911Y015311D01*
X018731Y016491D01*
X017375Y016491D01*
X016861Y016486D02*
X014486Y016486D01*
X014111Y016861D01*
X014111Y017361D01*
X014166Y017416D01*
X014166Y018125D01*
X014166Y019040D01*
X014237Y019111D01*
X013861Y019111D01*
X013611Y019361D01*
X013611Y020861D01*
X013111Y021361D01*
X013111Y021611D01*
X013561Y022061D01*
X017611Y022061D01*
X018811Y020861D01*
X018761Y020861D01*
X018261Y020361D01*
X017169Y020361D01*
X017169Y019861D01*
X016661Y019511D02*
X018261Y019511D01*
X019061Y020311D01*
X019607Y020311D01*
X019653Y020357D01*
X019653Y020857D02*
X019649Y020861D01*
X018811Y020861D01*
X018011Y021111D02*
X017811Y021311D01*
X017219Y021311D01*
X017169Y021361D01*
X017169Y020861D02*
X016811Y020861D01*
X016411Y020461D01*
X016411Y019661D01*
X015426Y018676D01*
X015426Y018125D01*
X015741Y018125D02*
X015741Y018591D01*
X016661Y019511D01*
X016661Y019161D02*
X018011Y019161D01*
X016661Y019161D02*
X016056Y018556D01*
X016056Y018125D01*
X015741Y018125D02*
X015741Y017831D01*
X015111Y018125D02*
X015111Y017361D01*
X015361Y017111D01*
X014796Y017296D02*
X014611Y017111D01*
X014796Y017296D02*
X014796Y018125D01*
X014481Y018125D02*
X014481Y018481D01*
X014611Y018611D01*
X014861Y018611D01*
X015111Y018861D01*
X015111Y018985D01*
X014985Y019111D01*
X016111Y020237D01*
X016111Y020861D01*
X015611Y021361D01*
X015111Y021361D01*
X013111Y020361D02*
X013111Y019611D01*
X012611Y019111D01*
X012611Y018861D01*
X013300Y018361D02*
X013536Y018125D01*
X013851Y018125D02*
X013851Y017371D01*
X013611Y017111D01*
X012847Y017121D02*
X012611Y017111D01*
X012361Y017111D01*
X011861Y017611D01*
X011861Y017861D01*
X012611Y017861D02*
X012611Y017361D01*
X012847Y017436D01*
X012111Y016861D02*
X011861Y017111D01*
X011485Y017111D01*
X011361Y017235D01*
X010361Y017235D01*
X010361Y016487D02*
X010235Y016361D01*
X010111Y016361D01*
X010611Y015861D01*
X010611Y015711D01*
X009611Y015361D02*
X008111Y016861D01*
X007485Y016861D01*
X006737Y016861D02*
X006581Y016861D01*
X005561Y017881D01*
X002741Y017881D01*
X002543Y017683D01*
X002543Y017043D01*
X002111Y016611D01*
X001985Y016611D01*
X001861Y016735D01*
X001111Y017111D02*
X001611Y017611D01*
X001795Y017683D01*
X001361Y018361D02*
X013300Y018361D01*
X012111Y016861D02*
X012111Y016361D01*
X012296Y016176D01*
X012847Y016176D01*
X012847Y015861D02*
X012237Y015861D01*
X011361Y016487D01*
X010361Y016487D01*
X011611Y015611D02*
X011676Y015546D01*
X012847Y015546D01*
X012852Y015236D02*
X012847Y015231D01*
X011731Y015231D01*
X011611Y015111D01*
X012416Y014916D02*
X010861Y013361D01*
X010861Y011611D01*
X012111Y012236D02*
X011236Y012986D01*
X011236Y012486D02*
X012735Y010987D01*
X012861Y010987D01*
X012987Y010861D01*
X013111Y010737D01*
X013111Y010361D01*
X014010Y009461D01*
X014111Y009461D01*
X014611Y009861D02*
X013611Y010861D01*
X013111Y010737D02*
X013111Y011111D01*
X013611Y011611D01*
X014611Y011611D01*
X014611Y010861D01*
X015286Y010186D01*
X019261Y010186D01*
X018811Y008861D02*
X018211Y008861D01*
X018033Y008683D01*
X017855Y008861D01*
X017461Y008861D01*
X017265Y008665D01*
X017265Y008084D01*
X017265Y008607D01*
X017011Y008861D01*
X015611Y008861D01*
X015611Y006986D01*
X015886Y006711D01*
X016087Y006711D01*
X016835Y006711D02*
X016835Y006485D01*
X016061Y005711D01*
X016061Y005510D01*
X016110Y005461D01*
X016111Y005460D01*
X016111Y004111D01*
X016487Y003735D01*
X016623Y003735D01*
X016661Y003711D01*
X017161Y003711D01*
X017211Y003661D01*
X017211Y003061D01*
X017161Y003011D01*
X016661Y003011D01*
X016623Y002987D01*
X016623Y003361D02*
X016111Y003361D01*
X015599Y002987D02*
X014735Y003851D01*
X014735Y005611D01*
X014735Y006487D01*
X013861Y007361D01*
X012861Y007361D02*
X012861Y007861D01*
X013760Y008760D01*
X014111Y008760D01*
X012837Y009087D02*
X012837Y009408D01*
X012837Y009087D02*
X012111Y008361D01*
X010236Y008361D01*
X009736Y007861D01*
X009736Y007635D01*
X009760Y007611D01*
X009760Y006646D01*
X009599Y006485D01*
X009987Y006485D01*
X010111Y006361D01*
X010111Y005861D01*
X009987Y005737D01*
X009599Y005737D01*
X009099Y005237D01*
X008486Y005237D01*
X008486Y005985D02*
X008486Y006236D01*
X008861Y006611D01*
X008612Y006111D02*
X008486Y005985D01*
X008612Y006111D02*
X009599Y006111D01*
X010623Y006485D02*
X010623Y007449D01*
X010461Y007611D01*
X011737Y007237D02*
X011861Y007361D01*
X011737Y007237D02*
X011737Y005611D01*
X010749Y005611D01*
X010623Y005737D01*
X010625Y005735D01*
X012485Y005611D02*
X013236Y005611D01*
X013987Y005611D01*
X016811Y005461D02*
X017987Y005461D01*
X017987Y005035D01*
X019211Y003811D01*
X019211Y003583D01*
X019218Y003576D01*
X019511Y003598D02*
X019533Y003576D01*
X019511Y003598D02*
X019511Y004311D01*
X019136Y004686D01*
X018936Y004686D01*
X019111Y005361D02*
X018735Y005461D01*
X018735Y006711D01*
X018735Y007285D01*
X019061Y007611D01*
X019061Y008079D01*
X019057Y008084D01*
X019057Y008615D01*
X018811Y008861D01*
X018033Y008683D02*
X018033Y008084D01*
X017777Y008084D02*
X017777Y006921D01*
X017987Y006711D01*
X016835Y006711D01*
X016761Y007386D02*
X016753Y007393D01*
X016753Y008084D01*
X016497Y008084D02*
X016497Y007722D01*
X016161Y007386D01*
X019057Y008084D02*
X019312Y008084D01*
X019111Y005361D02*
X020163Y004309D01*
X020163Y003576D01*
X020478Y003576D01*
X019848Y003576D02*
X019848Y002748D01*
X019511Y002411D01*
X019211Y002411D01*
X008361Y007111D02*
X006111Y004861D01*
X006111Y001861D01*
X005111Y001861D02*
X005111Y004361D01*
X005611Y004861D01*
X005611Y005861D01*
X006861Y007111D01*
X006861Y007401D01*
X006361Y007401D02*
X006361Y008111D01*
X006736Y008486D01*
X005486Y008486D01*
X004861Y007861D01*
X004861Y007401D01*
X004361Y007401D02*
X004361Y007111D01*
X004111Y006861D01*
X003611Y006861D01*
X003111Y006361D01*
X003111Y005111D01*
X004111Y004111D01*
X004111Y001861D01*
X005611Y006611D02*
X005611Y007401D01*
X005361Y007401D01*
X005611Y007401D02*
X005861Y007401D01*
X007361Y007401D02*
X007361Y007361D01*
X007861Y007361D01*
X008361Y007111D02*
X008361Y007611D01*
X006361Y009611D01*
X006361Y009821D01*
X006861Y009821D02*
X006861Y010361D01*
X006611Y010611D01*
X007111Y011111D02*
X007361Y010861D01*
X007111Y011111D02*
X004587Y011111D01*
X003337Y012361D01*
X003337Y012237D01*
X002611Y011511D01*
X001911Y010811D01*
X001685Y010811D01*
X001611Y010737D01*
X001111Y011361D02*
X001111Y009861D01*
X001611Y009361D01*
X002611Y009361D02*
X002611Y011511D01*
X001611Y011485D02*
X001235Y011485D01*
X001111Y011361D01*
X001111Y012861D01*
X001361Y013111D01*
X001611Y013111D01*
X001611Y013361D01*
X001861Y013235D01*
X001735Y013361D01*
X001611Y013361D01*
X001861Y013235D02*
X001987Y013361D01*
X002111Y013361D01*
X002611Y012861D01*
X003337Y012861D01*
X003861Y012861D01*
X004861Y011861D01*
X004861Y011611D01*
X003861Y011361D02*
X003861Y009821D01*
X004361Y009821D02*
X004361Y009261D01*
X003311Y008211D01*
X003311Y007661D01*
X002887Y007237D01*
X002611Y007237D01*
X001561Y007237D01*
X001561Y007985D02*
X002611Y007985D01*
X002611Y009361D01*
X003861Y008111D02*
X003861Y007401D01*
X003861Y008111D02*
X004861Y009111D01*
X004861Y009821D02*
X004861Y010736D01*
X005611Y010736D02*
X005611Y010361D01*
X005361Y010111D01*
X005361Y009821D01*
X007361Y009821D02*
X007361Y009861D01*
X007861Y009861D01*
X008111Y010111D01*
X008761Y010361D02*
X007411Y011711D01*
X006661Y011711D01*
X006011Y012361D01*
X005384Y012361D01*
X005384Y012861D02*
X005961Y012861D01*
X006461Y012361D01*
X007111Y012361D01*
X009111Y014361D01*
X008487Y014361D01*
X007611Y015237D01*
X007487Y015861D02*
X006986Y015861D01*
X005986Y014861D01*
X005384Y014861D01*
X005384Y015361D01*
X004861Y015861D02*
X003837Y015861D01*
X003337Y015361D01*
X003337Y014861D01*
X003337Y014361D02*
X002861Y014361D01*
X002361Y014861D01*
X001985Y014861D01*
X001861Y014985D01*
X001861Y014861D01*
X001361Y014861D01*
X001111Y015111D01*
X001111Y017111D01*
X000611Y017611D02*
X001361Y018361D01*
X000611Y017611D02*
X000611Y011611D01*
X001861Y012487D02*
X001987Y012361D01*
X003337Y012361D01*
X003611Y011611D02*
X003861Y011361D01*
X006486Y012861D02*
X006486Y013362D01*
X006611Y013487D01*
X006235Y013487D01*
X005861Y013861D01*
X005384Y013861D01*
X005384Y014361D02*
X004361Y014361D01*
X003337Y013861D02*
X002611Y013861D01*
X002361Y013861D01*
X002111Y014111D01*
X001987Y014111D01*
X001861Y014237D01*
X003337Y013361D02*
X004361Y013361D01*
X005384Y013361D01*
X006611Y014361D02*
X007423Y014361D01*
X008861Y013561D02*
X009611Y014311D01*
X009611Y015361D01*
X010611Y015010D02*
X010611Y014211D01*
X009811Y013411D01*
X009811Y012811D01*
X009836Y012786D01*
X008861Y013561D02*
X008861Y011611D01*
X008761Y010361D02*
X008761Y009011D01*
X008236Y008486D01*
X008237Y008487D01*
X012111Y012236D02*
X012987Y012236D01*
X013735Y012236D02*
X014361Y012236D01*
X015111Y013111D01*
X015111Y013597D01*
X015426Y013597D02*
X015426Y014046D01*
X014236Y015236D01*
X012852Y015236D01*
X012847Y014916D02*
X012416Y014916D01*
X012847Y014286D02*
X014036Y014286D01*
X014111Y014361D01*
X014166Y013597D02*
X014166Y013056D01*
X014361Y012861D01*
X013851Y013101D02*
X013711Y012898D01*
X013851Y013101D02*
X013851Y013597D01*
X013536Y013597D02*
X013536Y013536D01*
X013111Y012923D01*
X015237Y012361D02*
X015361Y012485D01*
X015361Y012611D01*
X015741Y012991D01*
X015741Y013597D01*
X015741Y014731D01*
X015611Y014861D01*
X015985Y012361D02*
X016111Y012235D01*
X016111Y012111D01*
X015611Y011611D01*
X014611Y011611D01*
X019211Y012011D02*
X019211Y013411D01*
X029361Y018611D02*
X030111Y017861D01*
X034611Y017861D01*
X034611Y016861D01*
X034736Y016736D01*
X034862Y016862D01*
X037112Y016862D01*
X035736Y016862D01*
X035611Y016987D01*
X035611Y017735D02*
X035738Y017862D01*
X037112Y017862D01*
X037112Y018862D02*
X035612Y018862D01*
X034611Y017861D01*
X034736Y016736D02*
X035611Y015861D01*
X037111Y015861D01*
X037112Y015862D01*
X037112Y019862D02*
X035736Y019862D01*
X035611Y019987D01*
X035611Y020735D02*
X035738Y020862D01*
X037112Y020862D01*
X020761Y021361D02*
X020757Y021357D01*
X019653Y021357D01*
X007611Y015985D02*
X007487Y015861D01*
X006737Y016861D02*
X006611Y016861D01*
X005111Y016111D02*
X004861Y015861D01*
X003337Y015361D02*
X002487Y015361D01*
X001861Y015987D01*
X035761Y006861D02*
X035762Y006862D01*
X037112Y006862D01*
X037112Y007862D01*
X037112Y008862D01*
X037112Y009862D01*
D32*
X037111Y001862D02*
X037111Y001861D01*
X018111Y012361D02*
X017985Y012361D01*
X014611Y009861D02*
X015611Y008861D01*
X013735Y010861D02*
X013611Y010861D01*
X006611Y014235D02*
X006611Y014361D01*
D33*
X007423Y014361D03*
X012111Y016861D03*
X015611Y014861D03*
X017611Y013361D03*
X021386Y014861D03*
X018611Y016111D03*
X016111Y020861D03*
X020761Y021361D03*
X002611Y013861D03*
X005611Y006611D03*
X008861Y006611D03*
X013236Y005611D03*
X016111Y003361D03*
X019611Y004861D03*
X015611Y008861D03*
D34*
X016161Y007386D03*
X016761Y007386D03*
X018936Y004686D03*
X019211Y002411D03*
X008236Y008486D03*
X006736Y008486D03*
X007861Y007361D03*
X005611Y005861D03*
X004861Y009111D03*
X004861Y010736D03*
X005611Y010736D03*
X006611Y010611D03*
X007361Y010861D03*
X008111Y010111D03*
X004861Y011611D03*
X003611Y011611D03*
X006486Y012861D03*
X004361Y013361D03*
X004361Y014361D03*
X005111Y016111D03*
X009111Y014361D03*
X011236Y012986D03*
X011236Y012486D03*
X009811Y012811D03*
X013111Y012923D03*
X013711Y012898D03*
X014361Y012861D03*
X014111Y014361D03*
X011611Y015111D03*
X011611Y015611D03*
X013611Y017111D03*
X014611Y017111D03*
X015361Y017111D03*
X012611Y017861D03*
X011861Y017861D03*
X012611Y018861D03*
X018011Y019161D03*
X018011Y021111D03*
X023661Y015311D03*
X021873Y014361D03*
X019211Y013411D03*
X018261Y013411D03*
X029361Y018611D03*
X035761Y006861D03*
X032661Y003761D03*
X000611Y011611D03*
M02*
